# Supplementary material for: Disease-modifying therapies and features linked to treatment response in type 1 diabetes prevention: a systematic review
Source: PubMed Central journal article supplement (PMC10550983; doi:10.1038/s43856-023-00357-y), 2023-10-05
Supplement: 43856_2023_357_MOESM1_ESM.pdf [file 43856_2023_357_MOESM1_ESM.pdf]

## Supplemental Note 1: PubMed/Embase Search Strategy

#1 Latent Autoimmune Diabetes in Adults [Mesh] OR "Diabetes Mellitus, Type 1 "[Mesh] OR "diabetes mellitus, type 1/prevention and control"[MeSH Terms] 81438 records

#2 (((prevent\* [Title/Abstract] OR delay [Title/Abstract] OR immunomod\* [Title/Abstract] OR immune therapy [Title/Abstract] OR "disease modifying therapy" [Title/Abstract] OR Antibodies, Monoclonal, Humanized / therapeutic use\* [Title/Abstract] OR C-peptide\* [Title/Abstract]) OR ("autoantibodies/analysis"[MeSH Terms]))

1922455 records

#3 (randomized controlled trial[Publication Type] OR randomized controlled trial[Title/Abstract]) OR (random\*[Title/Abstract] OR rct[Title/Abstract] OR randomized[Title/Abstract])  
1422392 records

#4 #1 AND #2 13273 records

#5 #4 AND #3 1169 records

Filters: Human, English, 1996-present 880 records

**Supplementary Table 1. Studies in individuals with new or recent onset T1D (<1 year since diagnosis)**

| Study ID                                                                                                                                         | n                                                                    | Intervention                                                                                | Multi-center | Blinding   | Primary Outcome(s)                   | Age range (years) | Positive ? |
|--------------------------------------------------------------------------------------------------------------------------------------------------|----------------------------------------------------------------------|---------------------------------------------------------------------------------------------|--------------|------------|--------------------------------------|-------------------|------------|
| Ergun-Longmire 2004 <sup>1</sup>                                                                                                                 | 197                                                                  | 1 mg po insulin vs. 10 mg po insulin vs. placebo x 6-36 mo                                  | Yes          | Double     | β Cell function                      | 5-60              | No         |
| Enander 2018 <sup>2</sup>                                                                                                                        | 54                                                                   | 48-72 hrs IV insulin vs. usual care                                                         | Yes          | None       | Not specified                        | 2-17.99           | No         |
| Chaillous 2000 (Diabète Insuline Orale) <sup>3</sup>                                                                                             | 131                                                                  | 2.5 mg po human biogenetic insulin daily vs. 7.5 mg po insulin vs. placebo x 12 mo          | Yes          | Double     | β Cell function                      | 7-40              | No         |
| Pozzilli 2000 <sup>4</sup> (IMDIAB VII)                                                                                                          | 80                                                                   | 5 mg daily po insulin x 12 mo vs. placebo                                                   | Yes          | Double     | HbA1c; Insulin dose; β Cell function | 6-22              | No         |
| Crinò 2004 <sup>5</sup> (IMDIAB IX)                                                                                                              | 64                                                                   | 25 mg/kg/d nicotinamide + 15 mg/kg/d vitamin E vs. 25 mg/kg/d nicotinamide x 2 yrs          | Yes          | Not Stated | β Cell function                      | 4-18              | No         |
| Pitocco 2006 <sup>6</sup> (IMDIAB XI)                                                                                                            | 70                                                                   | Calcitriol vs. Nicotinamide                                                                 | Yes          | None       | β Cell function                      | 6-22              | No         |
| Pozzilli 1997 <sup>7</sup> (IMDIAB IV)                                                                                                           | 84                                                                   | 15 mg/kg vitamin E vs. 25 mg/kg nicotinamide x 1 yr                                         | Yes          | Double     | β Cell function                      | 5-35              | No         |
| Coutant 1998 <sup>8</sup>                                                                                                                        | 63                                                                   | 2.5mg/d linomide vs. placebo x 12 mo                                                        | No           | Double     | Not specified                        | 10-20             | n/a        |
| Allen 1999 <sup>9</sup>                                                                                                                          | 94                                                                   | 23106 colony forming units TICE BCG intradermal injection x 1 vs. placebo                   | Yes          | Double     | Incidence of remission               | 5-18              | No         |
| Keymeulen 2005 <sup>10</sup>                                                                                                                     | 80                                                                   | 0.22 IU/kg/day ChAglyCD3 (otelixizumab) IV x 6 days vs. placebo                             | Yes          | Double     | β Cell function                      | 12-39             | Yes        |
| <ul style="list-style-type: none"> <li>• Keymeulen 2010 <sup>11</sup> (follow-up)</li> <li>• Demeester 2015 <sup>12</sup> (precision)</li> </ul> | <ul style="list-style-type: none"> <li>• 73</li> <li>• 80</li> </ul> |                                                                                             |              |            |                                      |                   | Yes        |
| Sherry 2011 <sup>13</sup> (Protégé)                                                                                                              | 516                                                                  | 14 d full dose, 14 d low dose, or 6 d full dose IV teplizumab vs. placebo at wk 0 and wk 26 | Yes          | Double     | HbA1c; Insulin dose                  | 12-39             | No         |
| <ul style="list-style-type: none"> <li>• Hagopian 2013 <sup>14</sup> (follow-up)</li> </ul>                                                      | <ul style="list-style-type: none"> <li>• 462</li> </ul>              | <ul style="list-style-type: none"> <li>• 24 mo follow-up</li> </ul>                         |              |            | β Cell function                      |                   | Yes        |
| Herold 2013 <sup>15</sup>                                                                                                                        | 63                                                                   | 14 d IV teplizumab vs. placebo                                                              | Yes          | Double     | β Cell function                      | 12-39             | Yes        |

|                                                                                                                                                                            |                            |                                                                                                                               |     |                   |                                                     |          |                 |
|----------------------------------------------------------------------------------------------------------------------------------------------------------------------------|----------------------------|-------------------------------------------------------------------------------------------------------------------------------|-----|-------------------|-----------------------------------------------------|----------|-----------------|
| Herold 2013 <sup>16</sup><br>(AbATE)<br>• Long 2016 <sup>17</sup><br>(precision)<br>• Long 2017 <sup>18</sup><br>(precision)                                               | 83<br>• 74<br>• 41         | 14 d IV teplizumab, with repeat at 1 yr vs. placebo                                                                           | Yes | None; Lab blinded | β Cell function                                     | 8-35     | Yes             |
| Aronson 2014 <sup>19</sup><br>(DEFEND-1)                                                                                                                                   | 272                        | 8 d IV otelexizumab (3.1 mg) vs. placebo, outcome at 12 months                                                                | Yes | Double            | β Cell function                                     | 12-45    | No              |
| Ambery 2014 <sup>20</sup><br>(DEFEND-2)                                                                                                                                    | 179                        | 8 d course IV otelexizumab (3.1 mg) vs. placebo                                                                               | Yes | Double            | β Cell function                                     | 12-45    | No              |
| Pescovitz 2009 <sup>21</sup><br>• Pescovitz 2014 <sup>22</sup><br>(follow-up)<br>• Herold 2011 <sup>23</sup><br>(precision)<br>• Linsley 2019 <sup>24</sup><br>(precision) | 87<br>• 77<br>• 78<br>• 54 | IV rituximab days 1, 8, 15, and 22 vs. placebo                                                                                | Yes | Double            | β Cell function<br><br>β Cell function at 24 months | 8-45     | Yes<br><br>• No |
| Ortqvist 2004 <sup>25</sup>                                                                                                                                                | 56                         | 5-7.5 mg/kg/d po diazoxide vs. placebo x 24 mo                                                                                | Yes | Double            | β Cell function                                     | 7-17     | Yes             |
| Walter 2009 <sup>26</sup>                                                                                                                                                  | 188                        | 0.1 mg sc inj of altered peptide ligand NBI-6024 at baseline, wk 2 and 4, and then qmo vs. placebo x 24 mo                    | Yes | Double            | β Cell function                                     | 12-35    | No              |
| Rother 2009 <sup>27</sup>                                                                                                                                                  | 128                        | 5,000 units/d or 30,000 units/d po human recombinant IFN-alpha vs. placebo x 1 yr                                             | Yes | Double            | β Cell function                                     | 3-25     | Yes             |
| Gottlieb 2010 <sup>28</sup>                                                                                                                                                | 126                        | 600mg/m <sup>2</sup> /d po mycophenolate mofetil (MMF) x 2 yrs, vs. MMF+1m/kg IV Daclizumab x 2, vs. placebo                  | Yes | Double            | β Cell function                                     | 8-45     | No              |
| Wherrett 2011 <sup>29</sup>                                                                                                                                                | 145                        | 20µg sc inj GAD-alum x 3 vs. GAD-alum x 2 /alum x 1 vs. alum x 3                                                              | Yes | Double            | β Cell function                                     | 3-45     | No              |
| Ludvigsson 2012 <sup>30</sup>                                                                                                                                              | 334                        | 20ug sc inj GAD-alum x 4, vs. 20ug sc GAD-alum x 2/placebo x 2 vs. placebo x 4                                                | Yes | Double            | β Cell function                                     | 10-20    | No              |
| Ludvigsson 2020 <sup>31</sup><br>(DIABGAD)                                                                                                                                 | 64                         | 450 d Vit. D + 90 d Ibuprofen + 20 µg sc inj GAD-alum x 2, vs. 40 µg GAD-alum, vs. Vit D +placebo+20 µg GAD-alum, vs. placebo | Yes | Double            | Not specified                                       | 10-17.99 | No              |

|                                                                                                                                                                                                                                                                      |                                                                   |                                                                                                              |     |                                 |                                  |       |              |
|----------------------------------------------------------------------------------------------------------------------------------------------------------------------------------------------------------------------------------------------------------------------|-------------------------------------------------------------------|--------------------------------------------------------------------------------------------------------------|-----|---------------------------------|----------------------------------|-------|--------------|
| Ludvigsson 2021 <sup>32</sup><br>(DIAGNODE-2)                                                                                                                                                                                                                        | 109                                                               | 4mg GAD-alum intralymphatic injection monthly x 3 + oral vitamin D (2,000 IE daily for 120 days) vs. placebo | Yes | Double                          | β Cell function                  | 6-45  | No           |
| Orban 2011 <sup>33</sup><br><br>• Orban 2014 <sup>34</sup><br>(follow-up)<br>• Orban 2014 <sup>35</sup><br>(precision)<br>• Cabrera 2018 <sup>36</sup><br>(precision)<br>• Linsley 2019 <sup>37</sup><br>(precision)<br>• Eichmann 2020 <sup>38</sup><br>(precision) | 112<br><br>• 112<br><br>• 87<br><br>• 74<br><br>• 105<br><br>• 59 | 10 mg/kg IV abatacept x 27 over two years vs. placebo<br><br>• 36 mo extended f/u (1 yr post tx cessation)   | Yes | Double                          | β Cell function                  | 6-45  | Yes          |
| Martin 2011 <sup>39</sup><br>(DIATOR)<br>• Strom 2012 <sup>40</sup><br>(precision)                                                                                                                                                                                   | 89<br><br>• 89                                                    | 80 mg/d atorvastatin vs. placebo x 18 mo                                                                     | Yes | Double                          | β Cell function                  | 18-39 | No           |
| Moran 2013 <sup>41</sup>                                                                                                                                                                                                                                             | 69                                                                | 2mg/kg sc injection monthly canakinumab x 12 mo vs. placebo                                                  | Yes | Double                          | β Cell function                  | 6-45  | No           |
| Moran 2013 <sup>41</sup><br>(AIDA)                                                                                                                                                                                                                                   | 69                                                                | 100 mg daily sc inj anakinra x 9 months vs. placebo                                                          | Yes | Double                          | β Cell function                  | 6-45  | No           |
| Gitelman 2013 <sup>42</sup><br>(START)<br><br>• Gitelman 2016 <sup>43</sup><br>(follow-up)                                                                                                                                                                           | 58<br><br>• 58                                                    | 6.5 mg/kg IV ATG vs. placebo<br><br>24-mo follow up                                                          | Yes | Double<br>blinded<br>after 3 mo | β Cell function                  | 12-35 | No<br><br>No |
| Ataie-Jafari 2013 <sup>44</sup>                                                                                                                                                                                                                                      | 61                                                                | 0.25mcg- 0.5 mcg/d po Alfacalcidol vs. placebo x 6 mo                                                        | Yes | Single                          | β Cell function;<br>insulin dose | 8-15  | Yes          |
| Nafei 2017 <sup>45</sup>                                                                                                                                                                                                                                             | 75                                                                | 2000IU/day Vit. D3 vs. usual care                                                                            | No  | None                            | Not specified                    | 4-12  | Yes          |
| Buckingham 2013 <sup>46</sup>                                                                                                                                                                                                                                        | 68                                                                | Hybrid closed loop using the Medtronic MiniMed system for 72-96 hrs vs. usual care                           | Yes | Outcomes<br>masked              | Not specified                    | 6-<46 | No           |
| Griffin 2014 <sup>47</sup><br>(REPAIR-T1D)                                                                                                                                                                                                                           | 68                                                                | 50-100 mg po sitagliptin + 30-60 mg po lansoprazole x12 months vs. placebo                                   | Yes | Double                          | β Cell function                  | 11-36 | No           |

|                                                      |        |                                                                                                                                 |     |                  |                 |       |     |
|------------------------------------------------------|--------|---------------------------------------------------------------------------------------------------------------------------------|-----|------------------|-----------------|-------|-----|
| Pozzilli 2020 <sup>48</sup>                          | 67     | Albiglutide sc injection 30 -50 mg weekly x 52 wks vs. placebo                                                                  | Yes | Double           | β Cell function | 18-30 | No  |
| Haller 2018 <sup>49</sup>                            | 89     | 2.5 mg/kg IV ATG vs. ATG + 6mg sc inj pegylated GCSF q2wks x 6 vs. placebo                                                      | Yes | Double           | β Cell function | 12-45 | Yes |
| • Haller 2019 <sup>50</sup><br>(follow-up)           | • 89   | • 24 mo extended f/u                                                                                                            |     |                  |                 |       | Yes |
| Lebenthal 2019 <sup>51</sup>                         | 70     | 60 mg/kg IV Alpha-1 Antitrypsin (Glassia) x 22 (52 wks), vs. 120 mg/kg x 22 vs. placebo                                         | Yes | Double           | β Cell function | 8-25  | No  |
| Quattrin 2020 <sup>52</sup><br>(T1GER)               | 84     | Golimumab 0, 2 wk induction then q2wk maintenance inj vs. placebo x 52 wks                                                      | Yes | Double           | β Cell function | 6-21  | Yes |
| vonHerrath 2021 <sup>53</sup>                        | 308    | 12 mg/kg monoclonal anti-IL-21 antibody q6 weeks vs. daily liraglutide sc inj vs. anti-IL-21 + liraglutide vs. placebo x 54 wks | Yes | Double           | β Cell function | 18-45 | Yes |
| Lagarde 2021 <sup>54</sup>                           | 76     | 90 or 180 mg/kg IV human-derived alpha1-proteinase inhibitor wkly x 13 wks vs. 26 wks vs. placebo                               | Yes | Partial blinding | β Cell function | 6-35  | No  |
| Kumar 2021 <sup>55</sup>                             | 96     | 3 mo high dose po multi-strain probiotic vs. placebo                                                                            | No  | Double           | HbA1c           | 2-12  | Yes |
| Groele 2021 <sup>56</sup>                            | 96     | 10 <sup>9</sup> colony-forming units/day po L. rhamnosus GG and B. lactis Bb12 vs. placebo x 6 mo                               | n/a | Double           | β Cell function | 8-17  | No  |
| Gitelman 2021 <sup>57</sup>                          | 67     | 400 mg po daily imatinib mesylate x 26 weeks vs. placebo                                                                        | Yes | Double           | β Cell function | 18-45 | Yes |
| Greenbaum 2021 <sup>58</sup><br>(EXTEND)             | 163    | 8 mg/kg IV Tocilizumab monthly x 7 vs. placebo                                                                                  | Yes | Double           | β Cell function | 6-17  | No  |
| Diggins 2021<br>(T1DAL) <sup>59</sup><br>(precision) | 26/49  | 15 mg alefacept IM qwk x 12; 12 wk off, qwk x 12 vs. placebo                                                                    | Yes | Double           | β Cell function | 12-35 | No  |
| Christie 2002 <sup>60</sup><br>(Precision)           | 97/188 | Cyclosporin vs. placebo x12 mo                                                                                                  | Yes | Double           | n/a             | 10-35 | n/a |

Follow-up or precision studies describing a randomized trial that is already included in the table are listed as bulleted subheadings. Po – per oral/orally, IV – intravenous, IMDIAB –nicotinamide in recent-onset IDDM study , HbA1c - hemoglobin A1c, TICE BCG – Tice Bacillus Calmette-Guerin, ChAglyCD3 – Otelexizumab, AbATE - Autoimmunity-Blocking Antibody for Tolerance trial, DEFEND - Durable Response Therapy Evaluation for Early or New-Onset Type 1 Diabetes, Sc – subcutaneous, Inj – injection, Qmo – every

month, MMF – Mycophenolate Mofetil, GAD-Alum – Glutamic acid decarboxylase – alum, , f/u – follow-up, tx – treatment, DIATOR – Diabetes Intervention with Atorvastatin, AIDA – Anti-Interleukin-1 in Diabetes Action, START - Study of Antithymocyte Globulin for Treatment of New-onset T1DM, ATG – Antithymocyte Globulin, GCSF - Granulocyte Colony-Stimulating Factor, Q2wks – every 2 weeks  
T1GER - SIMPONI to Arrest  $\beta$ -cell Loss in Type 1 Diabetes, Q6 – every 6, n/a – not applicable, EXTEND - Tocilizumab (TCZ) in New-onset Type 1 Diabetes, T1DAL - Inducing Remission in Type 1 Diabetes With Alefacept, IM – intramuscular, Qwk – every week

**Supplementary Table 2. Metabolic outcomes from studies in individuals with new or recent onset T1D.**

| Study ID                              | n   | Intervention                                                                          | C-peptide AUC Analysis                                                                    | Results (p value vs. control) (units in nmol/L or pmol/mL unless stated)                                                                                                |
|---------------------------------------|-----|---------------------------------------------------------------------------------------|-------------------------------------------------------------------------------------------|-------------------------------------------------------------------------------------------------------------------------------------------------------------------------|
| Enander <sup>2</sup> 2018             | 54  | IV insulin vs. usual care                                                             | Mean ± SD of 2 hr MMTT AUC                                                                | Usual Care: 23.9 ± 40.6 nmol/L*min<br>IV insulin: 18.26 ± 16.45 (ns)                                                                                                    |
| Sherry 2011 <sup>13</sup> (Protégé)*  | 516 | 14 d full dose x 2, 14 d low dose x 2, or 6 d full dose x 2 IV teplizumab vs. placebo | 1 yr median (IQR) change from baseline in 4 hr MMTT AUC                                   | Placebo: -0.14 (-0.30, 0.02) nmol/L*min<br>14 d full dose: -0.06 (-0.25, 0.12), p =0.0486;<br>14 d low dose: -0.13 (-0.33, 0.01);<br>6 d full dose: -0.08 (-0.31, 0.11) |
| Hagopian 2013 <sup>14</sup> (f/u)*    | 516 |                                                                                       | 2 yr mean change from baseline in 4-hr MMTT AUC adjusted for age group and baseline value | Placebo:-0.191;<br>14 d full dose: -0.136, p=0.027;<br>14 d low dose: -0.198, p=0.968;<br>6 d full dose: -0.174, p=0.312                                                |
| Herold 2013* <sup>15</sup>            | 63  | IV teplizumab vs. placebo                                                             | 12 mo mean (95% CI) 4 hr MMTT AUC                                                         | Placebo: 0.37 (0.32, 0.42);<br>Teplizumab: 0.45 (0.40, 0.51), p=0.03                                                                                                    |
| Herold 2013 <sup>16</sup> (AbATE)*    | 83  | IV teplizumab, with repeat course at 1 yr vs. placebo                                 | 24 mo mean (95% CI) change in 4 hr MMTT ln(AUC + 1) adjusted for baseline value           | Placebo: -0.46 (-0.57, -0.35);<br>Teplizumab: -0.28 (-0.36,-0.20), p=0.002                                                                                              |
| Aronson 2014 (DEFEND-1) <sup>19</sup> | 272 | IV otelixizumab vs. placebo                                                           | 12 mo change in 2 hr MMTT AUC                                                             | Placebo: -0.2 ± 0.037;<br>Otelixizumab: 0.025 ± 0.025 p=0.58                                                                                                            |
| Ambery 2014 (DEFEND-2) <sup>20</sup>  | 179 | IV otelixizumab vs. placebo                                                           | Difference in 12 mo change in 2 hr MMTT adjusted for age, continent, and baseline value   | -0.09 (95% CI -0.17 to 0; P = 0.051)                                                                                                                                    |
| Pescovitz <sup>21</sup> 2009*         | 87  | IV rituximab vs. placebo                                                              | 12 mo mean (95% CI) 2 hr MMTT log <sub>e</sub> ([mean AUC]+1) adjusted for age and sex.   | Placebo: 0.47 (0.39, 0.55)<br>Rituximab: 0.56 (0.50, 0.63), p=0.009                                                                                                     |
| Pescovitz 2014 <sup>22</sup> (F/u)    | 77  |                                                                                       | 24 mo mean (95% CI) 2 hr MMTT log <sub>e</sub> ([mean AUC]+1) adjusted for age and sex.   | Placebo: 0.336 (0.245, 0.433)<br>Rituximab: 0.398( 0.326, 0.473), p=0.15                                                                                                |
| Walter 2009 <sup>26</sup>             | 188 | NBI-6024 vs. placebo                                                                  | 24 mo mean ± SD 2 hr MMTT AUC                                                             | Placebo: 50 ± 45 pmol x min/ml;<br>NBI-6024: 57 ± 71; p=0.5                                                                                                             |

|                                            |     |                                                                       |                                                                                                                  |                                                                                                                                |
|--------------------------------------------|-----|-----------------------------------------------------------------------|------------------------------------------------------------------------------------------------------------------|--------------------------------------------------------------------------------------------------------------------------------|
| Rother 2009 <sup>*27</sup>                 | 128 | Human recombinant interferon- $\alpha$ (hrIFN- $\alpha$ ) vs. placebo | Mean $\pm$ SD % 2 hr MMTT AUC loss from 0-12 months                                                              | Placebo: 56 $\pm$ 29 %; 5000 units hrIFN- $\alpha$ : 29 $\pm$ 54, p=0.017; 30,000 units hrIFN- $\alpha$ : 48 $\pm$ 35, p=0.599 |
| Gottlieb 2010 <sup>28</sup>                | 126 | Mycophenolate mofetil (MMF), vs. MMF+ Daclizumab (DZB), vs. placebo   | 2 yr geometric mean (95%CI) 2 hr MMTT AUC                                                                        | Placebo: 0.27 (0.18 ,0.37); MMF: 0.25 (0.14 , 0.37) p=0.41; MMF +DZB: 0.28 (0.19 , 0.37) p=0.47                                |
| Wherrett 2011 <sup>29</sup>                | 145 | GAD-alum x 3 vs. GAD-alum x2/ alum x 1 vs. alum x 3                   | Ratio (95% CI) of population mean from first 2 hr AUC of 4 hr MMTT adjusted for age, sex, and baseline C-peptide | GAD-alum $\times$ 3: 0.998 (0.779, 1.22), p = 0.98; GAD-alum $\times$ 2/alum $\times$ 1: 0.926 (0.720, 1.13), p = 0.50)        |
| Ludvigsson 2012 <sup>30</sup>              | 334 | GAD-alum x 4,vs. GAD-alum x 2 placebo x 2 vs. placebo                 | 15 mo. mean estimated treatment ratio (95%CI) of change in 2 hr MMTT C-peptide AUC.                              | GAD x 4: 1.18 (0.955 - 1.458) p=0.13; GADx2/Placebo x 2: 1.149 (0.929 - 1.421), p=0.2                                          |
| Ludvigsson 2021 (DIAGNODE-2) <sup>32</sup> | 109 | Intralymphatic GAD-alum + vitamin D (vs. placebo                      | Mean (95%CI) treatment effect ratio from 2 hr MMTT AUC                                                           | 1.091 (0.845-1.408); p=0.5009                                                                                                  |
| Orban 2011 <sup>*33</sup>                  | 112 | Abatacept vs. placebo                                                 | 2 year geometric mean (95%CI) of 2 hr MMTT AUC adjusted for age, sex, and baseline value                         | Placebo: 0.266 (0.171, 0.368) Abatacept: 0.375 (0.290, 0.465) (p=0.0029)                                                       |
| Orban 2014 <sup>34</sup> (f/u)*            | 112 |                                                                       | 36 mo population mean (95%CI) MMTT 2-h AUC, adjusted for age, sex, and baseline value                            | Placebo: 0.141 (0.071,0.215); Abatacept: 0.217 (0.168,0.268), p=0.046                                                          |
| Moran 2013 <sup>41</sup>                   | 69  | Canakinumab vs. placebo                                               | 12 mo mean (95%CI) difference in 2 hr MMTT AUC vs. placebo                                                       | 0.01 (-0.11 to 0.14), p=0.86)                                                                                                  |
| Moran 2013 <sup>41</sup> (AIDA)            | 69  | Anakinra vs. placebo                                                  | 9 mo mean (95%CI) difference in 2 hr MMTT AUC vs. placebo                                                        | 0.02 (-0.09 to 0.15), p=0.71                                                                                                   |
| Gitelman 2013 <sup>42</sup> (START)        | 58  | ATG vs. placebo                                                       | 12 mo mean change (95%CI) in 2 hr MMTT AUC                                                                       | Placebo: -0.239 (-0.361,-0.118) ATG: -0.195 (-0.292, -0.098), p=0.591                                                          |
| Gitelman 2016 <sup>43</sup> (f/u)          | 58  |                                                                       | 24 mo change in the mean (95% CI) 2 hr C-peptide AUC from 4 hr MMTT, adjusted for baseline value                 | Placebo: -0.32 (-0.473,0.174); ATG: -0.27 (-0.373,0.171), p=0.38                                                               |



|                                         |              |                                                                         |                                                                                                         |                                                                                                                      |
|-----------------------------------------|--------------|-------------------------------------------------------------------------|---------------------------------------------------------------------------------------------------------|----------------------------------------------------------------------------------------------------------------------|
| Buckingham 2013 <sup>46</sup>           | 68           | Hybrid closed loop (HCL) vs. usual care                                 | Geometric mean (95%CI) 2 hr MMTT AUC                                                                    | Usual care: 0.52 (0.32,0.75);<br>HCL: 0.43 (0.34,0.52) p=0.49                                                        |
| Griffin 2014 (REPAIR-T1D) <sup>47</sup> | 68           | Sitagliptin + lansoprazole vs. placebo                                  | 12 mo mean change (95%CI) in 2 hr MMTT AUC                                                              | Placebo: -253 (-383,-123) ;<br>Sitagliptin+Lansoprazole: -229 (-316,-142),<br>p=0.77                                 |
| Pozzilli 2020 <sup>48</sup>             | 67           | Albiglutide sc injection 30 -50 mg weekly x 52 wks vs. placebo          | 52 wk Difference in least squares means (95%CI) vs placebo for change in 2 hr MMTT AUC                  | 0.04 (-0.13, 0.20) , p=0.6505                                                                                        |
| Haller 2018 <sup>49</sup>               | 89           | Low-dose ATG vs. ATG + GCSF vs. placebo                                 | 12 mo geometric-like means (95%CI) 2 hr AUC of 4 hr MMTT adjusted for for sex, age, and baseline value. | Placebo: 0.406 (0.324, 0.494)<br>ATG: 0.646 (0.547, 0.750), p = 0.0003<br>ATG/GCSF: 0.528 (0.435, 0.627), p = 0.031) |
| Haller 2019 (f/u) <sup>50</sup>         | 89           |                                                                         | 24 mo geometric-like means (95%CI) 2 hr AUC of 4 hr MMTT adjusted for for sex, age, and baseline value. | Placebo: 0.253 (0.177, 0.334)<br>ATG: 0.5 (0.412, 0.594) p=0<0.001<br>ATG+GCSF: 0.36 (0.281, 0.445)p=0.032           |
| Lebenthal 2019 <sup>51</sup>            | 70           | 60 mg/kg IV Alpha-1 Antitrypsin (A1AT) x vs. 120 mg/kg x 22 vs. placebo | 52 wk change in 2 hr MMTT AUC                                                                           | Placebo: -0.34<br>60mg/kg A1AT:- 0.55 p=0.677<br>120mg/kg A1AT:- 0.29 p=0.822                                        |
| Quattrin 2020 (T1GER) <sup>52</sup>     | 84           | Golimumab vs. placebo                                                   | Mean ± SD 52 wk 4 hr MMTT AUC                                                                           | Placebo: 0.43±0.39;<br>Golimumab: 0.64±0.42; p<0.001                                                                 |
| vonHerrath 2021 <sup>53</sup>           | 308          | Anti-IL-21 vs. liraglutide vs. combination vs. placebo                  | 54 wk estimated mean (95%CI) treatment ratio based on change in 4 hr MMTT AUC                           | IL-21: 1.23 (0.97–1.57), p=0.093<br>Liraglutide: 1.12 (0.87–1.42), p=0.38<br>Combination: 1.48 (1.16–1.89), p=0.0017 |
| Groele 2021 <sup>56</sup>               | 96           | L. rhamnosus GG and B. lactis Bb12 vs. placebo                          | 6 mo median (IQR) 2 hr MMTT AUC                                                                         | Placebo: 3.30 (2.14; 4.56) ng/mL<br>Treatment: 3.38 (2.24; 4.52), p=0.993                                            |
| Gitelman 2021 <sup>57</sup>             | 67           | Imatinib mesylate x 26 weeks vs. placebo                                | Mean difference (90% CI) 2 hr AUC from 4 hr MMTT adjusted for sex, baseline age, and baseline value     | 0.095 (-0.003 to 0.191), p=0.048                                                                                     |
| Greenbaum 2021 (EXTEND) <sup>58</sup>   | 81 pediatric | Tocilizumab vs. placebo                                                 | Wk 52 mean (95% CI) change in 2 hr MMTT AUC                                                             | Placebo: 0.391 (0.47,0.31)<br>Tocilizumab: 0.33 (0.39,0.28), p=0.277                                                 |

\*Studies with significant differences between a treatment group and placebo.

IV – intravenous, MMTT – mixed meal tolerance test, AUC – Area Under the Curve, f/u – follow-up, AbATE - Autoimmunity-Blocking Antibody for Tolerance trial, DEFEND - Durable Response Therapy Evaluation for Early or New-Onset Type 1 Diabetes, HrlFN- $\alpha$  – Human recombinant interferon-alpha, MMF – Mycophenolate mofetil, DZB – Daclizumab, GAD-Alum – Glutamic acid decarboxylase – alum, AIDA – Anti-Interleukin-1 in Diabetes Action, START - Study of Antithymocyte Globulin for Treatment of New-onset T1DM, HCL – Hybrid close Loop, Sc – subcutaneous , ATG – Antithymocyte Globulin, GCSF - Granulocyte Colony-Stimulating Factor, A1AT – Alpha-1 Antitrypsin , T1GER - SIMPONI to Arrest  $\beta$ -cell Loss in Type 1 Diabetes, EXTEND - Tocilizumab (TCZ) in New-onset Type 1 Diabetes

**Supplementary Table 3. Papers with Precision Analyses**

| Study ID                          | Pre-specified? | Sub-group # | Multiple comp. corrected? | Features used to define subgroups                                                      | Smallest sample size | Outcome     | Summary                                                                                                                                                                            |
|-----------------------------------|----------------|-------------|---------------------------|----------------------------------------------------------------------------------------|----------------------|-------------|------------------------------------------------------------------------------------------------------------------------------------------------------------------------------------|
| <b>Prevention</b>                 |                |             |                           |                                                                                        |                      |             |                                                                                                                                                                                    |
| Knip 2018 <sup>61</sup>           | Both           | 5           | No                        | Age; Sex; Family History of T1D; Specific HLA genotype; Study site/geographic location | 2                    | Time to T1D | No relationships with tx response to extensively hydrolyzed casein formula identified                                                                                              |
| Näntö-Salonen 2008 <sup>62</sup>  | Not stated     | 4           | No                        | Age; Aab #; Specific Aab; $\beta$ cell function measure                                | 29                   | Time to T1D | No relationships with intranasal insulin tx response identified                                                                                                                    |
| Gale 2004 <sup>63</sup>           | Pre-specified  | 5           | No                        | Age; Sex; Aab #; Dysglycemia/AGT; $\beta$ cell function measure                        | 11                   | Time to T1D | No relationships with nicotinamide tx response identified                                                                                                                          |
| Skylar 2002 <sup>64</sup>         | Pre-specified  | 2           | No                        | Dysglycemia/AGT                                                                        | 67                   | Time to T1D | No relationships with parenteral tx response identified                                                                                                                            |
| Skylar 2005 <sup>65</sup>         | Not stated     | 1           | n/a                       | Specific Aab                                                                           | 130                  | Time to T1D | Among participants with higher IAA titer, oral insulin tx associated with reduced risk of progression.                                                                             |
| Vehik 2011 <sup>66</sup>          |                | 1           | n/a                       | Specific Aab                                                                           | 130                  | Time to T1D | In 75% of original participants with median 9.1 yrs f/u, participants with higher IAA titer maintained tx effect until cessation of therapy, when effect dissipated.               |
| Krischer 2017 <sup>67</sup>       | Pre-specified  | 3           | No                        | Aab #; Specific Aab; $\beta$ cell function measure                                     | 55                   | Time to T1D | IAA+ Participants with ICA+ or GADA and IA2A+ with low FPIR with significant tx response to oral insulin. No significant response in high FPIR group or if ICA+ and GADA or IA2A+. |
| Elding Larsson 2018 <sup>68</sup> | Pre-specified  | 3           | No                        | Sex; Aab #; Dysglycemia/AGT                                                            | 7                    | Time to T1D | No relationships with GAD sc inj tx response identified                                                                                                                            |
| Herold 2019 <sup>69</sup>         | Pre-specified  | 12          | No                        | Age; Sex; BMI; Specific HLA genotype; Specific                                         | 8                    | Time to T1D | Significant effect of teplizumab vs placebo if: female, BMI >median, GADA+ positive or mIAA+, ICA-, ZnT8A-, or IA2A-, DR3-,                                                        |

|                              |               |   |     |                                                                                                    |                                                      |                                        |                                                                                                                                               |
|------------------------------|---------------|---|-----|----------------------------------------------------------------------------------------------------|------------------------------------------------------|----------------------------------------|-----------------------------------------------------------------------------------------------------------------------------------------------|
|                              |               |   |     | Aab; $\beta$ cell function measure; glucose                                                        |                                                      |                                        | DR4+, glucose > median, C-peptide AUC < median.                                                                                               |
| <b>Prevention Precision</b>  |               |   |     |                                                                                                    |                                                      |                                        |                                                                                                                                               |
| Butty 2008 <sup>70</sup>     | Post-hoc      | 6 | No  | Specific HLA genotype, other genetic risk feature                                                  | 5                                                    | Time to T1D                            | Enhanced effect of oral insulin in those with 1 but not 2 alleles for INS-23A SNP.                                                            |
| Sosenko 2020 <sup>71</sup>   | Post-hoc      | 1 | n/a | Diabetes progression risk score (DPTRS)                                                            | 37                                                   | C-peptide measure; Time to T1D         | For those with DPTRS $\geq 6.75$ oral insulin showed significant effect in DPT-1 and in combined data from TN and DPT-1 oral insulin studies. |
| <b>New Onset</b>             |               |   |     |                                                                                                    |                                                      |                                        |                                                                                                                                               |
| Greenbaum 2021 <sup>58</sup> | Both          | 2 | No  | Age; genetic risk feature                                                                          | 5                                                    | C-peptide measure                      | No relationships with tocilizumab tx response identified                                                                                      |
| Wherrett 2011 <sup>29</sup>  | Both          | 9 | No  | Age; Sex; Specific HLA genotype; Specific Aab; $\beta$ cell function measure; HbA1c                | not stated                                           | C-peptide measure                      | No relationships with GAD sc x treatment response identified                                                                                  |
| Pescovitz 2009 <sup>21</sup> | Not stated    | 7 | No  | Age; Sex; Specific HLA genotype; Aab #; $\beta$ cell function measure; Insulin dose/regimen; HbA1c | 11                                                   | C-peptide measure                      | No relationships with rituximab tx response identified                                                                                        |
| Martin 2011 <sup>39</sup>    | Not stated    | 7 | No  | Age; BMI; Aab #; $\beta$ cell function measure; Study site/geographic location                     | n/a                                                  | C-peptide measure                      | No relationships with atorvastatin tx response identified                                                                                     |
| Lebenthal 2019 <sup>51</sup> | Both          | 2 | No  | Age; $\beta$ cell function measure                                                                 | 1 (6% of 20 in placebo group for responder analysis) | C-peptide measure; HbA1c; insulin dose | No relationships with Alpha-1 Antitrypsin tx response identified                                                                              |
| Griffin 2014 <sup>47</sup>   | Pre-specified | 5 | No  | Age; Sex; $\beta$ cell function measure; Insulin dose or regimen; HbA1c                            | n/a                                                  | C-peptide measure                      | No relationships with Sitagliptin + lansoprazole tx response identified                                                                       |

|                               |               |    |     |                                                                                                                                   |     |                                 |                                                                                                                                                                                                                                                                       |
|-------------------------------|---------------|----|-----|-----------------------------------------------------------------------------------------------------------------------------------|-----|---------------------------------|-----------------------------------------------------------------------------------------------------------------------------------------------------------------------------------------------------------------------------------------------------------------------|
| Gottlieb 2010 <sup>28</sup>   | Not stated    | 6  | No  | Age; Sex; Aab #; $\beta$ cell function measure; Insulin dose/regimen; HbA1c                                                       | 10  | C-peptide measure               | No relationships with Mycophenolate mofetil (MMF) +/- Daclizumab (DZB) tx response identified                                                                                                                                                                         |
| Chaillous 2000 <sup>3</sup>   | Not stated    | 2  | No  | Age; Measure of $\beta$ cell function                                                                                             | n/a | C-peptide measure               | No relationships with oral human biogenetic insulin tx response identified                                                                                                                                                                                            |
| Buckingham 2013 <sup>46</sup> | Not stated    | 5  | No  | Age; Sex; $\beta$ cell function measure; HbA1c; DKA at dx                                                                         | 4   | C-peptide measure               | No relationships with hybrid closed loop tx response identified                                                                                                                                                                                                       |
| Aronson 2014 <sup>19</sup>    | Pre-specified | 10 | No  | Age; Sex; BMI; Aab #; Specific Aab; $\beta$ cell function measure; Study site/geographic location; Insulin dose or regimen; HbA1c | n/a | C-peptide measure               | No relationships with Otelixizumab tx response identified                                                                                                                                                                                                             |
| Rother 2009 <sup>27</sup>     | Post-hoc      | 1  | n/a | Age                                                                                                                               | 41  | C-peptide measure               | No relationships with oral interferon alpha tx response identified                                                                                                                                                                                                    |
| Pozzilli 2000 <sup>4</sup>    | Not stated    | 1  | n/a | Age                                                                                                                               |     | C-peptide measure; time to Aab+ | No relationships with oral insulin tx response identified                                                                                                                                                                                                             |
| Sherry 2011 <sup>13</sup>     | Pre-specified | 3  | No  | Age; Study site/geographic location; Duration of dx                                                                               | 31  | HbA1c                           | For 14-day full dose teplizumab, % participants with A1c <7% and lower insulin doses higher in 8-11 year olds, US participants, and participants randomized within 6 wks of dx                                                                                        |
| Hagopian 2013 <sup>72</sup>   | Pre-specified | 6  | No  | Age; $\beta$ cell function measure; Insulin dose/regimen; HbA1c; Study site/geographic location; Duration of dx                   | 31  | C-peptide measure               | For 14-day full dose teplizumab, 2-yr adjusted mean change in C-peptide AUC showed tx effect in participants in US, randomized in 6 wks from dx, or with baseline A1c<7.5%, insulin dose<0.4 u/kg/day, C-peptide >0.65 or >0.2, or if in the 8-17 yr old age category |
| Orban 2011 <sup>33</sup>      | Pre-specified | 7  | No  | Age; Sex; Specific HLA genotype; $\beta$ cell function measure; Insulin                                                           | n/a | C-peptide measure               | DR3+ participants with better ratio of abatacept tx effect while nonwhite participants with worse ratio of tx effect.                                                                                                                                                 |

|                               |               |    |     |                                                                                                                                                                                              |     |                   |                                                                                                                                                                                                                                                                                      |
|-------------------------------|---------------|----|-----|----------------------------------------------------------------------------------------------------------------------------------------------------------------------------------------------|-----|-------------------|--------------------------------------------------------------------------------------------------------------------------------------------------------------------------------------------------------------------------------------------------------------------------------------|
|                               |               |    |     | dose/regimen; HbA1c; race                                                                                                                                                                    |     |                   |                                                                                                                                                                                                                                                                                      |
| Orban 2014 <sup>34</sup>      | Pre-specified | 8  | Yes | Age; Sex; Race; $\beta$ cell function measure; Insulin dose/regimen; HbA1c; Specific HLA genotype;                                                                                           | 3   | C-peptide measure | Significant impact of white race and DR3+ status to improve 3-yr C-peptide AUC ratio of tx effect for abatacept vs. placebo, although race effect may be spurious due to small sample size (n=3 in placebo group).                                                                   |
| Moran 2013 <sup>41*</sup>     | Pre-specified | 9  | No  | Age; Sex; BMI; Specific HLA genotype; $\beta$ cell function measure; Insulin dose or regimen; ethnicity, T1D duration                                                                        | 11  | C-peptide measure | Participants with lower tertile of baseline C peptide in the canakinumab-treated group had significantly lower C-peptide concentrations at 1 year                                                                                                                                    |
| Moran 2013 <sup>41</sup>      | Pre-specified | 9  | No  | Age; Sex; BMI; Specific HLA genotype; $\beta$ cell function measure; Insulin dose/regimen; ethnicity, diabetes duration                                                                      | 11  | C-peptide measure | No relationships with anakinra tx response identified                                                                                                                                                                                                                                |
| Ludvigsson 2012 <sup>30</sup> | Pre-specified | 13 | No  | Age; Sex; BMI; Specific HLA genotype; Specific Aab #;; $\beta$ cell function measure; Study site/geographic location; Insulin dose or regimen; HbA1c; country, days since dx, pubertal stage | n/a | C-peptide measure | Participants who were male (all regimens), had baseline daily insulin dose of 0.398-0.605 IU/kg (all regimens), from non-Nordic European countries (4-dose regimen), or had baseline Tanner pubertal stage of 2 or 3 (4 dose regimen) had higher and significant estimated tx ratios |
| Herold 2013 <sup>15</sup>     | Post-hoc      | 2  | No  | Age; HbA1c                                                                                                                                                                                   | 7   | C-peptide measure | Improved teplizumab tx response in participants who were younger and baseline A1c < 6.5%.                                                                                                                                                                                            |
| Herold 2013 <sup>16</sup>     | Post-hoc      | 20 | No  | Age; Sex; BMI; Specific Aab #; $\beta$ cell function measure; Immune cell phenotype; Insulin dose/regimen; HbA1c                                                                             | 18  | C-peptide measure | Clinical responders to teplizumab with lower baseline A1c and insulin use; Baseline CCR4+ naive CCR6+ naive CCR4+ memory CD4+ T cells, CCR4+ naive or IFN-g+ CD8+ T cells higher in                                                                                                  |

|                                  |               |   |     |                                    |     |                                        |                                                                                                                                                                                               |
|----------------------------------|---------------|---|-----|------------------------------------|-----|----------------------------------------|-----------------------------------------------------------------------------------------------------------------------------------------------------------------------------------------------|
|                                  |               |   |     |                                    |     |                                        | nonresponders; Baseline effector memory and CD38+ terminally differentiated CD8+ T cells lower in nonresponders.                                                                              |
| Gitelman 2021 <sup>57</sup>      | Post-hoc      |   | No  | Age; $\beta$ cell function measure | n/a | C-peptide measure                      | Lower baseline C-peptide AUC associated with better response to imatinib mesylate                                                                                                             |
| Pozzilli 1997 <sup>7</sup>       | Post-hoc      | 1 | n/a | Age                                | 15  | C-peptide measure; HbA1c; insulin dose | The insulin dose required to reach the same metabolic control (based on HbA1c) in participants <15 yrs was higher in Vit E-treated vs. nicotinamide-treated participants.                     |
| Ludvigsson 2021 <sup>32</sup>    | Pre-specified | 1 | n/a | Specific HLA genotype              | 19  | C-peptide measure                      | HLA DR3-DQ2+ participants showed greater tx effect of GAD-alum intralymphatic inj + oral vitamin D.                                                                                           |
| Keymeulen 2005 <sup>10</sup>     | Not stated    | 1 | n/a | $\beta$ cell function measure      | 16  | C-peptide measure                      | Increase in insulin dose over follow up did not occur among participants treated with ChAglyCD3 with higher baseline glucose-clamp C-peptide release ( $\geq$ P50)                            |
| Gitelman 2013 <sup>42</sup>      | Post-hoc      | 1 | n/a | Age                                | 8   | C-peptide measure                      | No relationships with high dose ATG tx response identified.                                                                                                                                   |
| Gitelman 2016 <sup>43</sup>      | Post-hoc      | 1 | n/a | Age                                | 20  | C-peptide measure; HbA1c; insulin dose | Older age group (22-35 years) had more "responders: based on C-peptide AUC and showed significant impact of high dose ATG on C-peptide vs. placebo.                                           |
| Ergun-Longmire 2004 <sup>1</sup> | Not stated    | 1 | n/a | Age                                | n/a | C-peptide measure                      | Significant benefit of 1 mg and 10mg of oral insulin among subjects $\geq$ 20 yrs. In patients diagnosed before 20 yrs, 1 mg dose was ineffective, and 10 mg dose accelerated C-peptide loss. |
| Crinò 2004 <sup>5</sup>          | Not stated    | 1 | n/a | Age                                | 23  | C-peptide measure; HbA1c; insulin dose | For <9 yrs: at 6 months the nicotinamide (NA) +vitamin E group showed significantly higher C-peptide. For >9 yrs: NA alone showed higher C-peptide at 6 months and 9 months.                  |
| Coutant 1998 <sup>8</sup>        | Post-hoc      | 1 | n/a | $\beta$ cell function measure      | 40  | C-peptide measure;                     | Linomide tx associated with higher C-peptide in group with >0.1 pmol/L baseline C-peptide.                                                                                                    |

|                                    |                   |   |                 |                                       |                                                                  |                                                                            |                                                                                                                                                                                                                                                                                                                                                                                                                                    |
|------------------------------------|-------------------|---|-----------------|---------------------------------------|------------------------------------------------------------------|----------------------------------------------------------------------------|------------------------------------------------------------------------------------------------------------------------------------------------------------------------------------------------------------------------------------------------------------------------------------------------------------------------------------------------------------------------------------------------------------------------------------|
|                                    |                   |   |                 |                                       |                                                                  | HbA1c;<br>insulin dose                                                     |                                                                                                                                                                                                                                                                                                                                                                                                                                    |
| Ataie-Jafari<br>2013 <sup>44</sup> | Not<br>stated     | 1 | n/a             | Sex                                   | 7                                                                | C-peptide<br>measure;<br>daily insulin<br>dose                             | Males treated with alfacalcidol had<br>improved fasting C-peptide and lower<br>insulin doses by end of study vs. no<br>improvement in females.                                                                                                                                                                                                                                                                                     |
| Allen 1999 <sup>9</sup>            | Post-hoc          | 1 | n/a<br>subgroup | Age                                   | 34                                                               | C-peptide<br>measure                                                       | Fasting and stimulated C-peptide lower at<br>all time points in <10 yr group; rate of<br>stimulated C-peptide loss more rapid in<br><10 yr gr                                                                                                                                                                                                                                                                                      |
| vonHerrath<br>2021 <sup>53</sup>   | Pre-<br>specified | 1 | n/a             | $\beta$ cell function measure         | 27                                                               | C-peptide<br>measure                                                       | Participants with baseline C-peptide > 0.6<br>nmol/L showed no effect of combination tx<br>with anti-IL-21 and liraglutide.                                                                                                                                                                                                                                                                                                        |
| Walter 2009<br><sup>26</sup>       | Not<br>stated     | 3 | No              | Age; Sex; ethnicity                   | n/a                                                              | C-peptide<br>measure                                                       | No relationships with NBI-6024 tx<br>response identified.                                                                                                                                                                                                                                                                                                                                                                          |
| Keymeulen<br>2010 <sup>11</sup>    | Post-hoc          | 2 | Yes             | Age; $\beta$ cell function<br>measure | 9                                                                | C-peptide<br>measure;<br>HbA1c;<br>insulin dose                            | ChAglyCD3-treated subgroup with initial<br>C-peptide release $\geq$ 50th percentile<br>needed lower insulin doses than the<br>corresponding placebo subgroup, but no<br>difference in <50th percentile group; In<br>younger subgroup tx decreased insulin<br>doses and metabolic control vs. placebo<br>at months 24, 36 and 48; In the older<br>subgroup, effect on mean insulin doses<br>only significant and only at 24 months. |
| <b>New-onset<br/>Precision</b>     |                   |   |                 |                                       |                                                                  |                                                                            |                                                                                                                                                                                                                                                                                                                                                                                                                                    |
| Christie<br>2002 <sup>60</sup>     | Not<br>stated     | 5 | No              | Specific Aab #;                       | 23 for<br>ia2a but<br>numbers<br>not listed<br>for other<br>aabs | C-peptide<br>measure;<br>insulin<br>independenc<br>e; time in<br>remission | 1) Insulin doses lower, stimulated C-<br>peptide was higher, remission rates<br>increased and rate of recurrence lower in<br>cyclosporin treated IA-2A negative group<br><br>2) Cyclosporin tx decreased insulin dose<br>and had a positive effect on stimulated C-<br>peptide in GAD+IA-2A+, GAD-IA-2A-, and                                                                                                                      |



|                              |            |                           |     |                                                                                                                         |     |                    |                                                                                                                                                                                                                                                                             |
|------------------------------|------------|---------------------------|-----|-------------------------------------------------------------------------------------------------------------------------|-----|--------------------|-----------------------------------------------------------------------------------------------------------------------------------------------------------------------------------------------------------------------------------------------------------------------------|
|                              |            |                           |     |                                                                                                                         |     |                    | GAD+IA-2A+ groups, but had minimal effect on the GAD- IA-2A+ group.                                                                                                                                                                                                         |
| Linsley 2019 <sup>37</sup>   | Not stated | tested many gene modules  | No  | Immune cell phenotype; Other: Gene expression modules reflecting immunotypes based on whole blood RNA sequencing        | n/a | C-peptide measure  | A transient increase in activated B cells, reprogrammed costimulatory ligand gene expression, and reduced inhibition of anti-insulin antibodies immunotype was associated with resistance to abatacept tx; responders to drug were more likely to be older than median age. |
| Strom 2012 <sup>40</sup>     | Not stated | 8                         | No  | Age; Sex; BMI; $\beta$ cell function measure; Immune cell phenotype; Insulin dose or regimen; Total cholesterol and CRP | n/a | C-peptide measure  | Lower BMI and higher fasting baseline C-peptide associated with higher median C-peptide in placebo group but not atorvastatin group; Higher CRP in atorvastatin group but not placebo group associated with higher median C-peptide.                                        |
| Herold 2011 <sup>23</sup>    | Not stated | 12                        | No  | Immune cell phenotype                                                                                                   | 19  | C-peptide measure  | CD3+ and CD4+ cell counts were significantly higher in responders to rituximab. Nonresponders showed no change in proliferative responses to diabetes associated, islet-specific, and neuronal autoantigens over 12 mo.                                                     |
| Demeester 2015 <sup>12</sup> | Not stated | 7                         | No  | Age; Specific Aab #; $\beta$ cell function measure                                                                      | 9   | C-peptide measure; | Better otelexizumab response associated with higher titers of mIAA: In the placebo group, patients with higher IAA x C-peptide levels showed rapid loss of functional $\beta$ cell mass not observed in otelexizumab group.                                                 |
| Cabrera 2018 <sup>36</sup>   | Not stated | many transcripts analyzed | Yes | Immune cell phenotype                                                                                                   | 13  | C-peptide measure  | Higher baseline inflammatory index in placebo associated with worse C-peptide trajectory but this relationship not present in abatacept tx group, suggesting that higher baseline innate inflammation was associated with better tx response.                               |
| Long 2016 <sup>17</sup>      | Not stated | Many immune               | No  | Immune cell phenotype                                                                                                   | 22  | C-peptide measure  | A CD8+ T cell population accumulated in teplizumab responders that phenotypically resembled exhausted T cells: expressed                                                                                                                                                    |

|                            |               |         |      |                                                                      |     |                                                              |                                                                                                                                                                                                                                                                                                         |
|----------------------------|---------------|---------|------|----------------------------------------------------------------------|-----|--------------------------------------------------------------|---------------------------------------------------------------------------------------------------------------------------------------------------------------------------------------------------------------------------------------------------------------------------------------------------------|
|                            |               | modules |      |                                                                      |     |                                                              | high levels of the transcription factor EOMES, and multiple inhibitory receptors, including TIGIT and KLRG1.                                                                                                                                                                                            |
| Long 2017 <sup>18</sup>    | Not stated    | 4       | Yes  | Teplizumab anti-drug antibody (ADA) positivity                       | 5   | C-peptide measure; modulation of immune cell phenotype       | Only 1/7 teplizumab ADA+ individuals was a clinical responder at 13 mo; ADA+ subjects failed to show CD3 modulation on both CD4+ and CD8+ T cells at the time of the 2nd course. However, after 2nd course, magnitude of CD3 modulation was similar between ADA+ and ADA – groups.                      |
| Diggins 2021 <sup>59</sup> | Not stated    | 7       | Yes  | Immune cell phenotype changes in association with treatment response | 6   | C-peptide measure                                            | Greater C-peptide preservation by abatacept linked to RNAseq module of CD8+ Tcell activation- and exhaustion-associated genes. Flow cytometry data showed 2 hypoproliferative CD8+ memory cell phenotypes associated with tx response, expressing exhaustion-associated markers TIGIT and KLRG1.        |
| Linsley 2019 <sup>24</sup> | Not stated    | 5       | Yes  | Immune cell phenotype                                                | n/a | C-peptide measure                                            | Whole blood RNA-seq analysis with flow cytometry f/u testing showed that a transient increase in multiple T cell populations was associated with decreased pharmacodynamic activity of rituximab, increased proliferative response to islet antigens, and rapid C-peptide loss.                         |
| Orban 2014 <sup>35</sup>   | Pre-specified | 12      | Yes. | Immune cell phenotype                                                | n/a | C-peptide measure; Changes in immune cell subset frequencies | Placebo-treated participants with an increase in central memor CD4 T cells showed subsequent C-peptide decline, but this effect was abrogated by abatacept tx. Abatacept tx resulted in slower C-peptide loss in association with central memory CD4 T cell contraction and naïve CD4 T cell expansion. |

|                             |            |              |     |                       |     |                   |                                                       |
|-----------------------------|------------|--------------|-----|-----------------------|-----|-------------------|-------------------------------------------------------|
| Eichmann 2020 <sup>38</sup> | Not stated | many subsets | No. | Immune cell phenotype | n/a | C-peptide measure | No relationship with abatacept tx response identified |
|-----------------------------|------------|--------------|-----|-----------------------|-----|-------------------|-------------------------------------------------------|

\*Moran 2013 paper includes analyses from 2 trials

Bolding indicates paper classification: prevention, precision prevention, new onset, or precision new onset

Abbreviations: tx- treatment; dx- diagnosis; BMI body mass index; Aab- islet autoantibody; ZnT8- zinc transporter 8 autoantibody; GADA- glutamic acid decarboxylase autantibody; IAA- insulin autoantibody; ICA- islet cell autoantibody; IA2A- islet antigen 2 autoantibody

T1D – type 1 diabetes, HLA - Human Leukocyte Antigens, Tx – treatment, Aab – autoantibody, AGT – Abnormal glucose tolerance, n/a – not applicable, IAA – Insulin autoantibody, f/u – follow-up, ICA – Islet cell autoantibody, GADA – glutamic acid decarboxylase antibody, IA2A – insulinoma-associated protein 2 autoantibody, FPIR – first phase insulin response, Sc – subcutaneous, Inj – injection, BMI – body mass index, ZnT8A - zinc transporter-8 antibody, AUC – area under the curve, SNP – single nucleotide polymorphism, DPTRS – Diabetes Prevention Trial-Type 1 Risk Score, DPT-1 – Diabetes Prevention Trial-Type 1, TN – TrialNet, HbA1c – hemoglobin A1c, GAD Glutamic Acid Decarboxylase, MMF – Mycophenolate Mofetil, DZB – Daclizumab, DKA – Diabetes Ketoacidosis, Dx – diagnosis, ChAglyCD3 – Otelexizumab, ATG - Antithymocyte Globulin, NA – Nicotinamide, Gr – group, CRP – C-reactive protein, ADA – anti-drug antibody

## Supplemental References

- 1 Ergun-Longmire, B. *et al.* Oral insulin therapy to prevent progression of immune-mediated (type 1) diabetes. *Ann N Y Acad Sci* **1029**, 260-277 (2004). <https://doi.org:10.1196/annals.1309.057>
- 2 Enander, R. *et al.* Beta cell function after intensive subcutaneous insulin therapy or intravenous insulin infusion at onset of type 1 diabetes in children without ketoacidosis. *Pediatric diabetes* **19**, 1079-1085 (2018). <https://doi.org:10.1111/pedi.12657>
- 3 Chaillous, L. *et al.* Oral insulin administration and residual beta-cell function in recent-onset type 1 diabetes: a multicentre randomised controlled trial. Diabète Insuline Orale group. *Lancet* **356**, 545-549 (2000). [https://doi.org:10.1016/s0140-6736\(00\)02579-4](https://doi.org:10.1016/s0140-6736(00)02579-4)
- 4 Pozzilli, P. *et al.* No effect of oral insulin on residual beta-cell function in recent-onset type I diabetes (the IMDIAB VII). IMDIAB Group. *Diabetologia* **43**, 1000-1004 (2000). <https://doi.org:10.1007/s001250051482>
- 5 Crinò, A. *et al.* A randomized trial of nicotinamide and vitamin E in children with recent onset type 1 diabetes (IMDIAB IX). *Eur J Endocrinol* **150**, 719-724 (2004). <https://doi.org:10.1530/eje.0.1500719>
- 6 Pitocco, D. *et al.* The effects of calcitriol and nicotinamide on residual pancreatic beta-cell function in patients with recent-onset Type 1 diabetes (IMDIAB XI). *Diabet Med* **23**, 920-923 (2006). <https://doi.org:10.1111/j.1464-5491.2006.01921.x>
- 7 Pozzilli, P. *et al.* Vitamin E and nicotinamide have similar effects in maintaining residual beta cell function in recent onset insulin-dependent diabetes (the IMDIAB IV study). *Eur J Endocrinol* **137**, 234-239 (1997). <https://doi.org:10.1530/eje.0.1370234>
- 8 Coutant, R. *et al.* Low dose linomide in Type I juvenile diabetes of recent onset: a randomised placebo-controlled double blind trial. *Diabetologia* **41**, 1040-1046 (1998). <https://doi.org:10.1007/s001250051028>
- 9 Allen, H. F. *et al.* Effect of Bacillus Calmette-Guerin vaccination on new-onset type 1 diabetes. A randomized clinical study. *Diabetes Care* **22**, 1703-1707 (1999). <https://doi.org:10.2337/diacare.22.10.1703>
- 10 Keymeulen, B. *et al.* Insulin needs after CD3-antibody therapy in new-onset type 1 diabetes. *N Engl J Med* **352**, 2598-2608 (2005). <https://doi.org:10.1056/NEJMoa043980>
- 11 Keymeulen, B. *et al.* Four-year metabolic outcome of a randomised controlled CD3-antibody trial in recent-onset type 1 diabetic patients depends on their age and baseline residual beta cell mass. *Diabetologia* **53**, 614-623 (2010). <https://doi.org:10.1007/s00125-009-1644-9>
- 12 Demeester, S. *et al.* Preexisting insulin autoantibodies predict efficacy of otelixizumab in preserving residual  $\beta$ -cell function in recent-onset type 1 diabetes. *Diabetes Care* **38**, 644-651 (2015). <https://doi.org:10.2337/dc14-1575>
- 13 Sherry, N. *et al.* Teplizumab for treatment of type 1 diabetes (Protégé study): 1-year results from a randomised, placebo-controlled trial. *Lancet* **378**, 487-497 (2011). [https://doi.org:10.1016/s0140-6736\(11\)60931-8](https://doi.org:10.1016/s0140-6736(11)60931-8)

- 14 Hagopian, W. *et al.* Teplizumab preserves C-peptide in recent-onset type 1 diabetes: two-year results from the randomized, placebo-controlled Protégé trial. *Diabetes* **62**, 3901-3908 (2013). <https://doi.org:10.2337/db13-0236>
- 15 Herold, K. C. *et al.* Teplizumab treatment may improve C-peptide responses in participants with type 1 diabetes after the new-onset period: a randomised controlled trial. *Diabetologia* **56**, 391-400 (2013). <https://doi.org:10.1007/s00125-012-2753-4>
- 16 Herold, K. C. *et al.* Teplizumab (anti-CD3 mAb) treatment preserves C-peptide responses in patients with new-onset type 1 diabetes in a randomized controlled trial: metabolic and immunologic features at baseline identify a subgroup of responders. *Diabetes* **62**, 3766-3774 (2013). <https://doi.org:10.2337/db13-0345>
- 17 Long, S. A. *et al.* Partial exhaustion of CD8 T cells and clinical response to teplizumab in new-onset type 1 diabetes. *Sci Immunol* **1** (2016). <https://doi.org:10.1126/sciimmunol.aai7793>
- 18 Long, S. A. *et al.* Remodeling T cell compartments during anti-CD3 immunotherapy of type 1 diabetes. *Cell Immunol* **319**, 3-9 (2017). <https://doi.org:10.1016/j.cellimm.2017.07.007>
- 19 Aronson, R. *et al.* Low-dose oteplizumab anti-CD3 monoclonal antibody DEFEND-1 study: results of the randomized phase III study in recent-onset human type 1 diabetes. *Diabetes Care* **37**, 2746-2754 (2014). <https://doi.org:10.2337/dc13-0327>
- 20 Ambery, P. *et al.* Efficacy and safety of low-dose oteplizumab anti-CD3 monoclonal antibody in preserving C-peptide secretion in adolescent type 1 diabetes: DEFEND-2, a randomized, placebo-controlled, double-blind, multi-centre study. *Diabet Med* **31**, 399-402 (2014). <https://doi.org:10.1111/dme.12361>
- 21 Pescovitz, M. D. *et al.* Rituximab, B-lymphocyte depletion, and preservation of beta-cell function. *N Engl J Med* **361**, 2143-2152 (2009). <https://doi.org:10.1056/NEJMoa0904452>
- 22 Pescovitz, M. D. *et al.* B-lymphocyte depletion with rituximab and  $\beta$ -cell function: two-year results. *Diabetes Care* **37**, 453-459 (2014). <https://doi.org:10.2337/dc13-0626>
- 23 Herold, K. C. *et al.* Increased T cell proliferative responses to islet antigens identify clinical responders to anti-CD20 monoclonal antibody (rituximab) therapy in type 1 diabetes. *J Immunol* **187**, 1998-2005 (2011). <https://doi.org:10.4049/jimmunol.1100539>
- 24 Linsley, P. S. *et al.* Elevated T cell levels in peripheral blood predict poor clinical response following rituximab treatment in new-onset type 1 diabetes. *Genes Immun* **20**, 293-307 (2019). <https://doi.org:10.1038/s41435-018-0032-1>
- 25 Ortqvist, E. *et al.* Temporary preservation of beta-cell function by diazoxide treatment in childhood type 1 diabetes. *Diabetes Care* **27**, 2191-2197 (2004). <https://doi.org:10.2337/diacare.27.9.2191>
- 26 Walter, M., Philotheou, A., Bonnici, F., Ziegler, A. G. & Jimenez, R. No effect of the altered peptide ligand NBI-6024 on beta-cell residual function and insulin needs in new-onset type 1 diabetes. *Diabetes Care* **32**, 2036-2040 (2009). <https://doi.org:10.2337/dc09-0449>

- 27 Rother, K. I. *et al.* Effect of ingested interferon-alpha on beta-cell function in children with new-onset type 1 diabetes. *Diabetes Care* **32**, 1250-1255 (2009). <https://doi.org:10.2337/dc08-2029>
- 28 Gottlieb, P. A. *et al.* Failure to preserve beta-cell function with mycophenolate mofetil and daclizumab combined therapy in patients with new-onset type 1 diabetes. *Diabetes Care* **33**, 826-832 (2010). <https://doi.org:10.2337/dc09-1349>
- 29 Wherrett, D. K. *et al.* Antigen-based therapy with glutamic acid decarboxylase (GAD) vaccine in patients with recent-onset type 1 diabetes: a randomised double-blind trial. *Lancet* **378**, 319-327 (2011). [https://doi.org:10.1016/s0140-6736\(11\)60895-7](https://doi.org:10.1016/s0140-6736(11)60895-7)
- 30 Ludvigsson, J. *et al.* GAD65 antigen therapy in recently diagnosed type 1 diabetes mellitus. *N Engl J Med* **366**, 433-442 (2012). <https://doi.org:10.1056/NEJMoa1107096>
- 31 Ludvigsson, J. *et al.* Combined vitamin D, ibuprofen and glutamic acid decarboxylase-alum treatment in recent onset Type 1 diabetes: Lessons from the DIABGAD randomized pilot trial. *Future Science OA* **6** (2020). <https://doi.org:10.2144/fsoa-2020-0078>
- 32 Ludvigsson, J. *et al.* Intralymphatic Glutamic Acid Decarboxylase With Vitamin D Supplementation in Recent-Onset Type 1 Diabetes: A Double-Blind, Randomized, Placebo-Controlled Phase IIb Trial. *Diabetes Care* **44**, 1604-1612 (2021). <https://doi.org:10.2337/dc21-0318>
- 33 Orban, T. *et al.* Co-stimulation modulation with abatacept in patients with recent-onset type 1 diabetes: a randomised, double-blind, placebo-controlled trial. *Lancet* **378**, 412-419 (2011). [https://doi.org:10.1016/s0140-6736\(11\)60886-6](https://doi.org:10.1016/s0140-6736(11)60886-6)
- 34 Orban, T. *et al.* Costimulation modulation with abatacept in patients with recent-onset type 1 diabetes: follow-up 1 year after cessation of treatment. *Diabetes Care* **37**, 1069-1075 (2014). <https://doi.org:10.2337/dc13-0604>
- 35 Orban, T. *et al.* Reduction in CD4 central memory T-cell subset in costimulation modulator abatacept-treated patients with recent-onset type 1 diabetes is associated with slower C-peptide decline. *Diabetes* **63**, 3449-3457 (2014). <https://doi.org:10.2337/db14-0047>
- 36 Cabrera, S. M. *et al.* Innate immune activity as a predictor of persistent insulin secretion and association with responsiveness to CTLA4-Ig treatment in recent-onset type 1 diabetes. *Diabetologia* **61**, 2356-2370 (2018). <https://doi.org:10.1007/s00125-018-4708-x>
- 37 Linsley, P. S., Greenbaum, C. J., Speake, C., Long, S. A. & Dufort, M. J. B lymphocyte alterations accompany abatacept resistance in new-onset type 1 diabetes. *JCI Insight* **4** (2019). <https://doi.org:10.1172/jci.insight.126136>
- 38 Eichmann, M. *et al.* Costimulation Blockade Disrupts CD4(+) T Cell Memory Pathways and Uncouples Their Link to Decline in beta-Cell Function in Type 1 Diabetes. *J Immunol* **204**, 3129-3138 (2020). <https://doi.org:10.4049/jimmunol.1901439>
- 39 Martin, S. *et al.* Residual beta cell function in newly diagnosed type 1 diabetes after treatment with atorvastatin: the Randomized DIATOR Trial. *PLoS One* **6**, e17554 (2011). <https://doi.org:10.1371/journal.pone.0017554>

- 40 Strom, A. *et al.* Improved preservation of residual beta cell function by atorvastatin in patients with recent onset type 1 diabetes and high CRP levels (DIATOR trial). *PLoS One* **7**, e33108 (2012). <https://doi.org/10.1371/journal.pone.0033108>
- 41 Moran, A. *et al.* Interleukin-1 antagonism in type 1 diabetes of recent onset: two multicentre, randomised, double-blind, placebo-controlled trials. *Lancet* **381**, 1905-1915 (2013). [https://doi.org/10.1016/s0140-6736\(13\)60023-9](https://doi.org/10.1016/s0140-6736(13)60023-9)
- 42 Gitelman, S. E. *et al.* Antithymocyte globulin treatment for patients with recent-onset type 1 diabetes: 12-month results of a randomised, placebo-controlled, phase 2 trial. *Lancet Diabetes Endocrinol* **1**, 306-316 (2013). [https://doi.org/10.1016/s2213-8587\(13\)70065-2](https://doi.org/10.1016/s2213-8587(13)70065-2)
- 43 Gitelman, S. E. *et al.* Antithymocyte globulin therapy for patients with recent-onset type 1 diabetes: 2 year results of a randomised trial. *Diabetologia* **59**, 1153-1161 (2016). <https://doi.org/10.1007/s00125-016-3917-4>
- 44 Ataie-Jafari, A. *et al.* A randomized placebo-controlled trial of alphacalcidol on the preservation of beta cell function in children with recent onset type 1 diabetes. *Clin Nutr* **32**, 911-917 (2013). <https://doi.org/10.1016/j.clnu.2013.01.012>
- 45 Nafei, L. T., Kadhim, K. A., Said, A. M. & Ghani, S. H. Evaluation the effect of vitamin D3 on glycemic indices on Iraqi children with type 1 DM. *International Journal of Pharmaceutical Sciences Review and Research* **42**, 134-143 (2017).
- 46 Buckingham, B. *et al.* Effectiveness of early intensive therapy on  $\beta$ -cell preservation in type 1 diabetes. *Diabetes Care* **36**, 4030-4035 (2013). <https://doi.org/10.2337/dc13-1074>
- 47 Griffin, K. J., Thompson, P. A., Gottschalk, M., Kylo, J. H. & Rabinovitch, A. Combination therapy with sitagliptin and lansoprazole in patients with recent-onset type 1 diabetes (REPAIR-T1D): 12-month results of a multicentre, randomised, placebo-controlled, phase 2 trial. *Lancet Diabetes Endocrinol* **2**, 710-718 (2014). [https://doi.org/10.1016/s2213-8587\(14\)70115-9](https://doi.org/10.1016/s2213-8587(14)70115-9)
- 48 Pozzilli, P. *et al.* Randomized 52-week Phase 2 Trial of Albiglutide Versus Placebo in Adult Patients With Newly Diagnosed Type 1 Diabetes. *J Clin Endocrinol Metab* **105** (2020). <https://doi.org/10.1210/clinem/dgaa149>
- 49 Haller, M. J. *et al.* Low-Dose Anti-Thymocyte Globulin (ATG) Preserves  $\beta$ -Cell Function and Improves HbA(1c) in New-Onset Type 1 Diabetes. *Diabetes Care* **41**, 1917-1925 (2018). <https://doi.org/10.2337/dc18-0494>
- 50 Haller, M. J. *et al.* Low-Dose Anti-Thymocyte Globulin Preserves C-Peptide, Reduces HbA(1c), and Increases Regulatory to Conventional T-Cell Ratios in New-Onset Type 1 Diabetes: Two-Year Clinical Trial Data. *Diabetes* **68**, 1267-1276 (2019). <https://doi.org/10.2337/db19-0057>
- 51 Lebenthal, Y. *et al.* A Phase II, Double-Blind, Randomized, Placebo-Controlled, Multicenter Study Evaluating the Efficacy and Safety of Alpha-1 Antitrypsin (AAT) (Glassia®) in the Treatment of Recent-Onset Type 1 Diabetes. *Int J Mol Sci* **20** (2019). <https://doi.org/10.3390/ijms20236032>
- 52 Quattrin, T. *et al.* Golimumab and Beta-Cell Function in Youth with New-Onset Type 1 Diabetes. *N Engl J Med* **383**, 2007-2017 (2020). <https://doi.org/10.1056/NEJMoa2006136>

- 53 von Herrath, M. *et al.* Anti-interleukin-21 antibody and liraglutide for the preservation of  $\beta$ -cell function in adults with recent-onset type 1 diabetes: a randomised, double-blind, placebo-controlled, phase 2 trial. *Lancet Diabetes Endocrinol* **9**, 212-224 (2021). [https://doi.org:10.1016/s2213-8587\(21\)00019-x](https://doi.org:10.1016/s2213-8587(21)00019-x)
- 54 Lagarde, W. H. *et al.* Human plasma-derived alpha(1) -proteinase inhibitor in patients with new-onset type 1 diabetes mellitus: A randomized, placebo-controlled proof-of-concept study. *Pediatr Diabetes* **22**, 192-201 (2021). <https://doi.org:10.1111/pedi.13162>
- 55 Kumar, S. *et al.* A high potency multi-strain probiotic improves glycemic control in children with new-onset type 1 diabetes mellitus: A randomized, double-blind, and placebo-controlled pilot study. *Pediatric diabetes* **22**, 1014-1022 (2021). <https://doi.org:10.1111/pedi.13244>
- 56 Groele, L. *et al.* Lack of effect of Lactobacillus rhamnosus GG and Bifidobacterium lactis Bb12 on beta-cell function in children with newly diagnosed type 1 diabetes: a randomised controlled trial. *BMJ Open Diabetes Res Care* **9** (2021). <https://doi.org:10.1136/bmjdr-2020-001523>
- 57 Gitelman, S. E. *et al.* Imatinib therapy for patients with recent-onset type 1 diabetes: a multicentre, randomised, double-blind, placebo-controlled, phase 2 trial. *Lancet Diabetes Endocrinol* **9**, 502-514 (2021). [https://doi.org:10.1016/s2213-8587\(21\)00139-x](https://doi.org:10.1016/s2213-8587(21)00139-x)
- 58 Greenbaum, C. J. *et al.* IL-6 receptor blockade does not slow beta cell loss in new-onset type 1 diabetes. *JCI Insight* **6** (2021). <https://doi.org:10.1172/jci.insight.150074>
- 59 Diggins, K. E. *et al.* Exhausted-like CD8+ T cell phenotypes linked to C-peptide preservation in alefacept-treated T1D subjects. *JCI Insight* **6** (2021). <https://doi.org:10.1172/jci.insight.142680>
- 60 Christie, M. R., Mølviq, J., Hawkes, C. J., Carstensen, B. & Mandrup-Poulsen, T. IA-2 antibody-negative status predicts remission and recovery of C-peptide levels in type 1 diabetic patients treated with cyclosporin. *Diabetes Care* **25**, 1192-1197 (2002). <https://doi.org:10.2337/diacare.25.7.1192>
- 61 Knip, M. *et al.* Effect of Hydrolyzed Infant Formula vs Conventional Formula on Risk of Type 1 Diabetes. *JAMA* **319**, 38 (2018). <https://doi.org:10.1001/jama.2017.19826>
- 62 Näntö-Salonen, K. *et al.* Nasal insulin to prevent type 1 diabetes in children with HLA genotypes and autoantibodies conferring increased risk of disease: a double-blind, randomised controlled trial. *Lancet* **372**, 1746-1755 (2008). [https://doi.org:10.1016/s0140-6736\(08\)61309-4](https://doi.org:10.1016/s0140-6736(08)61309-4)
- 63 Gale, E. A., Bingley, P. J., Emmett, C. L. & Collier, T. European Nicotinamide Diabetes Intervention Trial (ENDIT): a randomised controlled trial of intervention before the onset of type 1 diabetes. *Lancet* **363**, 925-931 (2004). [https://doi.org:10.1016/s0140-6736\(04\)15786-3](https://doi.org:10.1016/s0140-6736(04)15786-3)
- 64 Effects of insulin in relatives of patients with type 1 diabetes mellitus. *N Engl J Med* **346**, 1685-1691 (2002). <https://doi.org:10.1056/NEJMoa012350>
- 65 Skyler, J. S. *et al.* Effects of oral insulin in relatives of patients with type 1 diabetes: The Diabetes Prevention Trial--Type 1. *Diabetes Care* **28**, 1068-1076 (2005). <https://doi.org:10.2337/diacare.28.5.1068>



- 66 Vehik, K. *et al.* Long-term outcome of individuals treated with oral insulin: diabetes prevention trial-type 1 (DPT-1) oral insulin trial. *Diabetes Care* **34**, 1585-1590 (2011). <https://doi.org:10.2337/dc11-0523>
- 67 Krischer, J. P., Schatz, D. A., Bundy, B., Skyler, J. S. & Greenbaum, C. J. Effect of Oral Insulin on Prevention of Diabetes in Relatives of Patients With Type 1 Diabetes: A Randomized Clinical Trial. *Jama* **318**, 1891-1902 (2017). <https://doi.org:10.1001/jama.2017.17070>
- 68 Elding Larsson, H., Lundgren, M., Jonsdottir, B., Cuthbertson, D. & Krischer, J. Safety and efficacy of autoantigen-specific therapy with 2 doses of alum-formulated glutamate decarboxylase in children with multiple islet autoantibodies and risk for type 1 diabetes: A randomized clinical trial. *Pediatr Diabetes* **19**, 410-419 (2018). <https://doi.org:10.1111/pedi.12611>
- 69 Herold, K. C. *et al.* An Anti-CD3 Antibody, Teplizumab, in Relatives at Risk for Type 1 Diabetes. *New England Journal of Medicine* **381**, 603-613 (2019). <https://doi.org:10.1056/nejmoa1902226>
- 70 Butty, V., Campbell, C., Mathis, D. & Benoist, C. Impact of diabetes susceptibility loci on progression from pre-diabetes to diabetes in at-risk individuals of the diabetes prevention trial-type 1 (DPT-1). *Diabetes* **57**, 2348-2359 (2008). <https://doi.org:10.2337/db07-1736>
- 71 Sosenko, J. M. *et al.* Slowed Metabolic Decline After 1 Year of Oral Insulin Treatment Among Individuals at High Risk for Type 1 Diabetes in the Diabetes Prevention Trial-Type 1 (DPT-1) and TrialNet Oral Insulin Prevention Trials. *Diabetes* **69**, 1827-1832 (2020). <https://doi.org:10.2337/db20-0166>
- 72 Hagopian, W. *et al.* Teplizumab preserves C-peptide in recent-onset type 1 diabetes: two-year results from the randomized, placebo-controlled Protege trial. *Diabetes* **62**, 3901-3908 (2013). <https://doi.org:10.2337/db13-0236>
